# Supplementary material for: Application of machine learning to discover new intermetallic catalysts for the hydrogen evolution and the oxygen reduction reactions
Source: Royal Society of Chemistry journal article supplement (doi:10.1039/d4cy00491d), 2024-01-01
Supplement: d4cy00491d1.pdf [file d4cy00491d1.pdf]

# Supplementary Information of Application of machine learning to discover new intermetallic catalysts for the hydrogen evolution and the oxygen reduction reactions

Carmen Martínez-Alonso<sup>1,2,3</sup>, Valentin Vassilev-Galindo<sup>1</sup>, Benjamin M. Comer<sup>3</sup>, Frank Abild-Pedersen<sup>3</sup>, Kirsten T. Winther<sup>3</sup>, and Javier LLorca<sup>\*1,4</sup>

<sup>1</sup>IMDEA Materials Institute, C/Eric Kandel 2, 28906 - Getafe, Madrid, Spain.

<sup>2</sup>Department of Inorganic Chemistry, Complutense University of Madrid, 28040 Madrid, Spain.

<sup>3</sup>SUNCAT Center for Interface Science and Catalysis, Department of Chemical Engineering, Stanford University, Stanford, California 94305, United States; SUNCAT Center for Interface Science and Catalysis, SLAC National Accelerator Laboratory, Menlo Park, California 94025, United States.

<sup>4</sup>Department of Materials Science, Polytechnic University of Madrid, E. T. S. de Ingenieros de Caminos, 28040 Madrid, Spain.

May 20, 2024

---

\*To whom correspondence should be addressed: [javier.llorca@upm.es](mailto:javier.llorca@upm.es) , [javier.llorca@imdea.org](mailto:javier.llorca@imdea.org)

## Minimum and maximum values of the descriptors

| Descriptor                             | max value             | min value            |
|----------------------------------------|-----------------------|----------------------|
| Unit cell volume                       | 358.93 Å <sup>3</sup> | 10.49 Å <sup>3</sup> |
| Weighted atomic radius (WAR)           | 180 pm                | 127.5 pm             |
| Generalized coordination number (GCN)  | 5.25                  | 0.5                  |
| Weighted electronegativity (WEN)       | 2.4 (Pauling)         | 1.23 (Pauling)       |
| Weighted first ionization energy (WIE) | 9.39 eV               | 5.86 eV              |
| Outer electrons of A ( $S_A$ )         | 12                    | 2                    |
| Outer electrons of B ( $S_B$ )         | 12                    | 1                    |
| $\Psi$                                 | 106.73                | 3.41                 |
| Biaxial strain                         | -8.00%                | 8.00%                |

Table S 1: Minimum and maximum values of the descriptors.

## Database details

| Type                       | H         |        | O         |        | OH        |        | System |
|----------------------------|-----------|--------|-----------|--------|-----------|--------|--------|
|                            | No Strain | Strain | No Strain | Strain | No Strain | Strain |        |
| Pure metals                | 72        | 125    | 70        | 126    | 68        | 107    | 24     |
| AB bcc(101)                | 220       | 190    | 193       | 182    | 218       | 152    | 58     |
| AB fcc(101)                | 14        | 0      | 14        | 0      | 0         | 0      | 8      |
| A <sub>2</sub> B hcp(0001) | 21        | 0      | 19        | 0      | 0         | 0      | 6      |
| A <sub>3</sub> B fcc(111)  | 111       | 105    | 114       | 110    | 103       | 125    | 26     |
| A <sub>3</sub> B hcp(0001) | 36        | 30     | 36        | 27     | 31        | 4      | 8      |

Table S 2: Number of entries in the databases.

## Hyperparameter values

| Hyperparameter    | $E_{\text{ads}}^H$ | $E_{\text{ads}}^{O/OH}$ |
|-------------------|--------------------|-------------------------|
| n_estimators      | 1000               | 1000                    |
| max_features      | 9                  | 10                      |
| min_samples_split | 4                  | 3                       |
| min_samples_leaf  | 1                  | 1                       |
| max_depth         | 600                | 300                     |

Table S 3: Optimized hyperparameters for the Random Forest Regressor model in the prediction of the adsorption energy of hydrogen, oxygen, and hydroxyl.

## Calculation of equilibrium lattice parameters

| Stoichiometry      | Material           | Calculated by DFT |         | Materials Project |         |
|--------------------|--------------------|-------------------|---------|-------------------|---------|
|                    |                    | $a$ (Å)           | $c$ (Å) | $a$ (Å)           | $c$ (Å) |
| A                  | Pt                 | 3.96              | 3.96    | 3.94              | 3.94    |
|                    | Ag                 | 4.09              | 4.09    | 4.10              | 4.10    |
|                    | Au                 | 4.16              | 4.16    | 4.17              | 4.17    |
|                    | Ir                 | 3.87              | 3.87    | 3.85              | 3.85    |
|                    | Pd                 | 3.94              | 3.94    | 3.92              | 3.92    |
|                    | Co                 | 2.49              | 4.04    | 2.47              | 4.03    |
| AB                 | AlFe               | 2.86              | 2.86    | 2.85              | 2.85    |
|                    | AlNi               | 2.89              | 2.89    | 2.86              | 2.86    |
|                    | AlRu               | 3.00              | 3.00    | 2.98              | 2.98    |
|                    | CuPd               | 3.02              | 3.02    | 2.98              | 2.98    |
|                    | DyIn               | 3.74              | 3.74    | 3.74              | 3.74    |
|                    | FeRh               | 3.00              | 3.00    | 2.99              | 2.99    |
|                    | HfRu               | 3.23              | 3.23    | 3.23              | 3.23    |
|                    | MgSc               | 3.58              | 3.58    | 3.60              | 3.60    |
|                    | NdZn               | 3.67              | 3.67    | 3.67              | 3.67    |
|                    | RuV                | 3.00              | 3.00    | 3.00              | 3.00    |
| TiRe               | 3.12               | 3.12              | 3.11    | 3.11              |         |
| A <sub>2</sub> B   | Fe <sub>2</sub> Zr | 5.22              | 16.66   | 5.02              | 16.43   |
|                    | Os <sub>2</sub> Y  | 5.21              | 8.98    | 5.28              | 8.93    |
|                    | Re <sub>2</sub> Sm | 5.24              | 8.98    | 5.45              | 8.93    |
|                    | Ru <sub>2</sub> Sm | 5.15              | 8.80    | 5.27              | 9.06    |
| A <sub>3</sub> B   | Al <sub>3</sub> Li | 4.02              | 4.02    | 4.00              | 4.00    |
|                    | Co <sub>3</sub> Ti | 3.60              | 3.60    | 3.59              | 3.59    |
|                    | In <sub>3</sub> Sc | 4.53              | 4.53    | 4.50              | 4.50    |
|                    | In <sub>3</sub> Y  | 4.65              | 4.65    | 4.63              | 4.63    |
|                    | Ir <sub>3</sub> Ti | 3.87              | 3.87    | 3.86              | 3.86    |
|                    | Ir <sub>3</sub> Zr | 3.98              | 3.98    | 3.96              | 3.96    |
|                    | Pd <sub>3</sub> Y  | 4.13              | 4.13    | 4.10              | 4.10    |
|                    | Pt <sub>3</sub> In | 4.05              | 4.05    | 4.02              | 4.02    |
|                    | Zn <sub>3</sub> Mn | 3.82              | 3.82    | 3.81              | 3.81    |
|                    | Zn <sub>3</sub> Nb | 3.94              | 3.94    | 3.91              | 3.91    |
| Zr <sub>3</sub> Al | 4.38               | 4.38              | 4.38    | 4.38              |         |

Table S 4: Equilibrium lattice parameters ( $a$  and  $c$ ) in Å. Displayed values calculated by DFT and obtained from Materials Project Database for all the different stoichiometries.

## Feature distributions

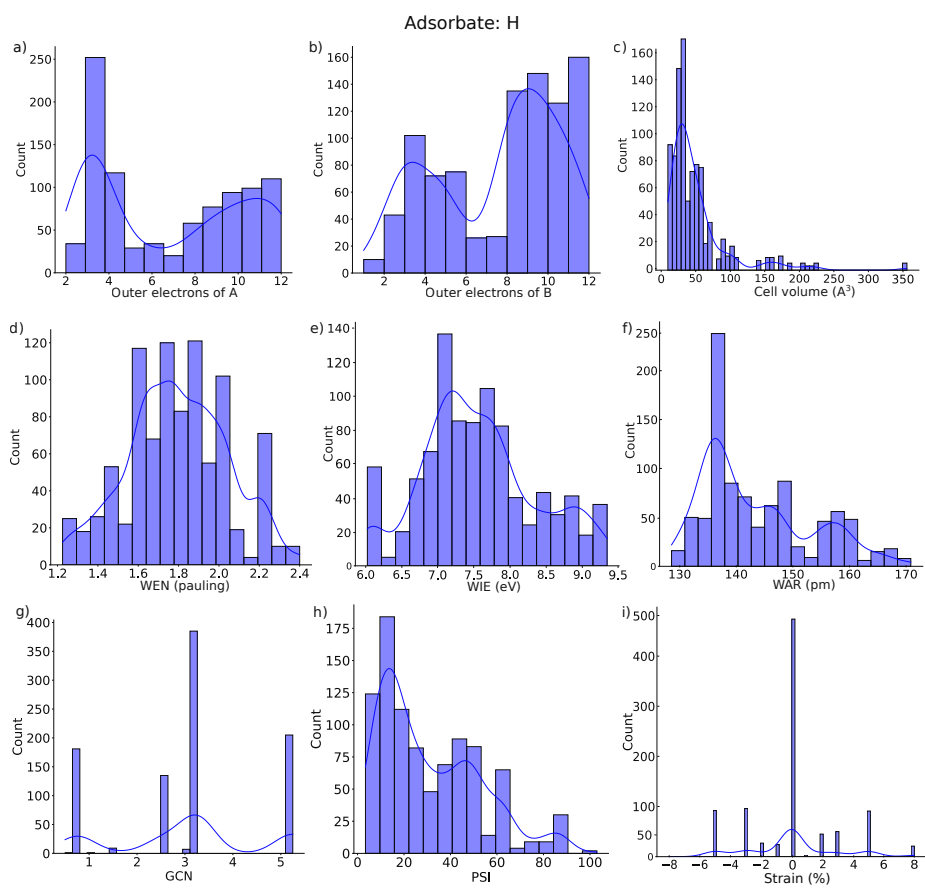

Figure S 1: **Feature distributions:** Hydrogen adsorption database.

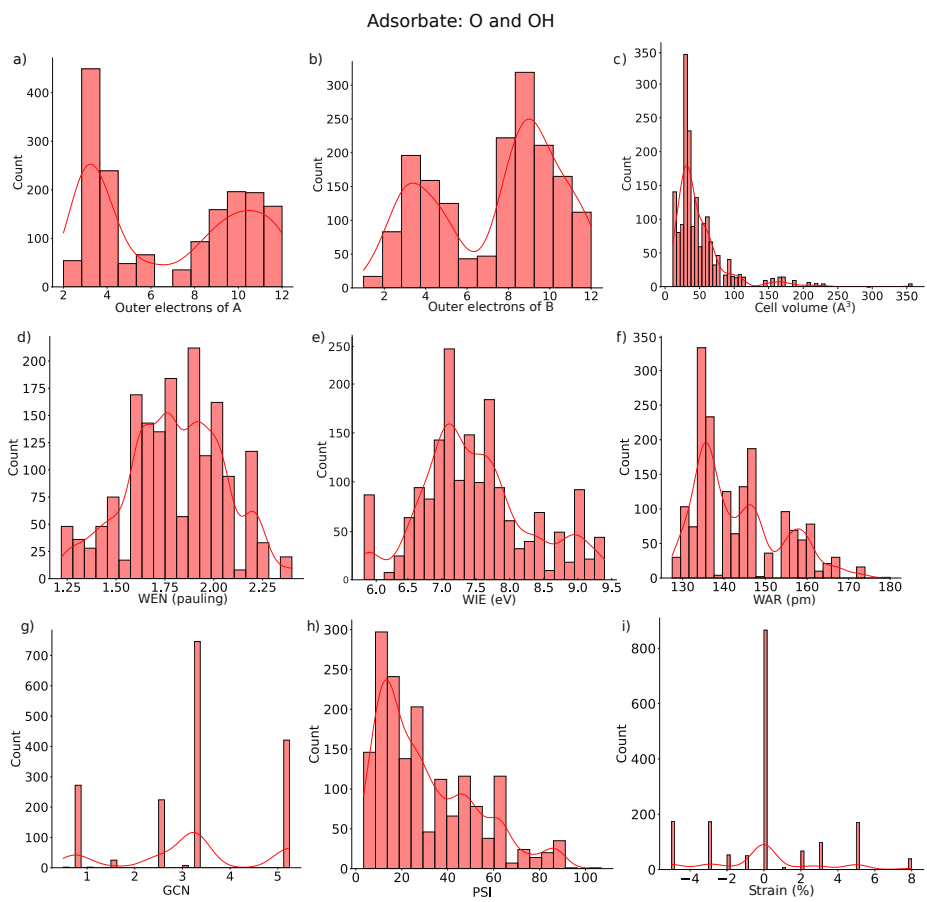

Figure S 2: **Feature distributions:** Oxygen and hydroxyl adsorption database.

## Learning curves

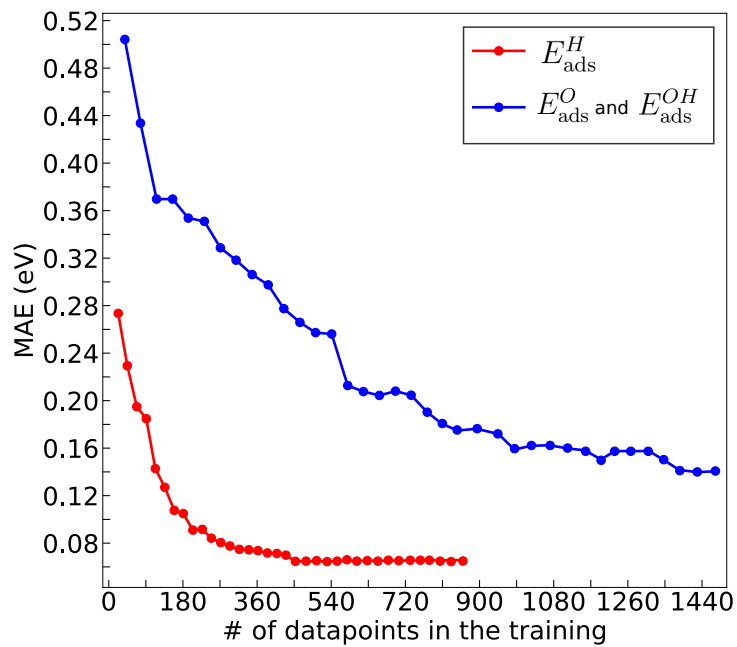

Figure S 3: **Learning curves:** for the hydrogen (red) and the oxygen/hydroxyl (blue) machine learning models.

## Verification parity plots

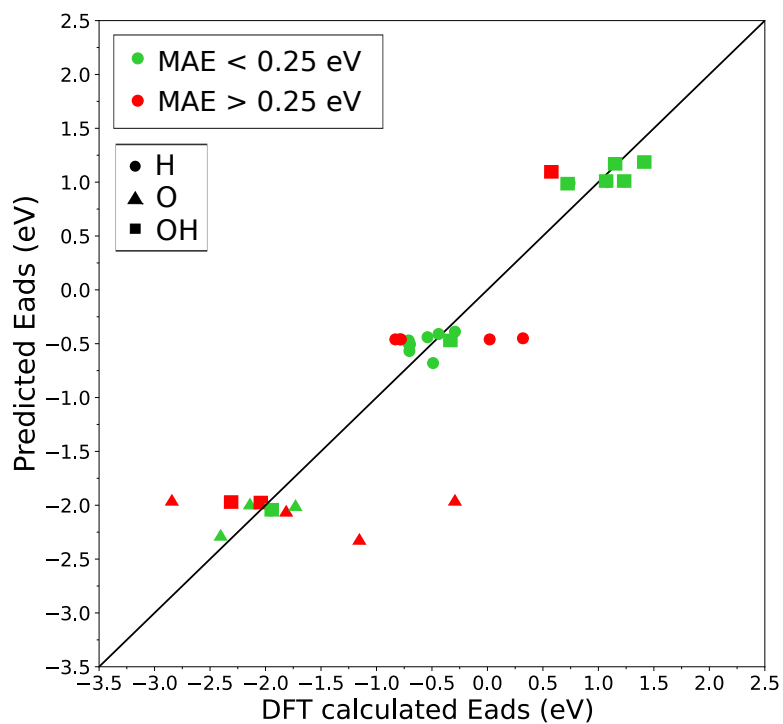

Figure S 4: **Parity plot for the 30 verification candidates:** Green signs represent the candidates that obtained accurate predictions by the RF model ( $\text{MAE} < 0.25 \text{ eV}$ ). Red signs represent the candidates that obtained high errors ( $\text{MAE} > 0.25 \text{ eV}$ ) by the RF model. Dots, triangles, and squares, illustrate the adsorption energies for H, O, and OH, respectively.



## Optimum adsorption energies

### HER

| Material | Strain | Adsorption site | $E_{\text{ads}}^H$ (eV) |
|----------|--------|-----------------|-------------------------|
| Pt       | 0      | FCC             | -0.49                   |
| Ce3Ga    | 5      | fccAAA          | -0.49                   |
| Ce3In    | 5      | fccAAA          | -0.49                   |
| Ce3Sn    | 1      | fccAAB          | -0.49                   |
| Ir3W     | -3     | hcpAAA          | -0.52                   |
| Nd3In    | 5      | hcpAAA          | -0.47                   |
| Ni3Fe    | 0      | hcpAAB          | -0.50                   |
| Ni3Pt    | 1      | hcpAAA          | -0.49                   |
| Pd3Ce    | -1     | fccAAB          | -0.49                   |
| Pd3Dy    | 1      | hcpAAA          | -0.49                   |
| Pd3Fe    | -5     | fccAAA          | -0.49                   |
| Pd3Nd    | -3     | hcpAAA          | -0.49                   |
| Pd3Pr    | -5     | hcpAAA          | -0.49                   |
| Pd3Sc    | -3     | fccAAA          | -0.49                   |
| Pd3Sm    | -5     | hcpAAA          | -0.47                   |
| Pd3Y     | -3     | fccAAA          | -0.48                   |
| Pr3In    | 5      | fccAAB          | -0.48                   |
| Pt3Co    | 0      | fccAAB          | -0.49                   |
| Pt3Dy    | 0      | hcpAAA          | -0.49                   |
| Pt3Sc    | -3     | fccAAB          | -0.49                   |
| Pt3Sm    | -5     | fccAAB          | -0.49                   |
| Pt3Sn    | -5     | fccAAA          | -0.50                   |
| Pt3Y     | 0      | hcpAAA          | -0.48                   |
| Rh3Mo    | 0      | fccAAA          | -0.46                   |
| Sm3In    | 3      | hcpAAA          | -0.47                   |
| Sn3Nd    | 5      | fccAAB          | -0.47                   |
| Sn3Sm    | 3      | fccAAB          | -0.49                   |
| Zn3Ti    | -5     | fccAAB          | -0.48                   |

Table S 5: Optimum hydrogen adsorption energies (in comparison with Pt at zero strain). The adsorption sites and the strains are indicated in the table.

## ORR

| Material | Strain | Adsorption site | $E_{\text{ads}}^O$ (eV) | Strain | Adsorption site | $E_{\text{ads}}^{OH}$ (eV) |
|----------|--------|-----------------|-------------------------|--------|-----------------|----------------------------|
| Pt       | 0      | FCC             | -1.79                   | 0      | FCC             | 1.19                       |
| Ag3In    | 5      | fccAAB          | -1.79                   | -5     | hcpAAA          | 1.15                       |
| ZnAu     | 3      | threefoldAAB    | -1.78                   | 0      | longbridgeB     | 1.36                       |
| Cu3Pt    | -5     | fccAAB          | -1.79                   | 3      | ontopB          | 1.19                       |
| Ir3Sc    | -1     | ontopB          | -1.94                   | -1     | fccAAA          | 1.19                       |
| Ni3Pt    | -5     | hcpAAA          | -1.89                   | 3      | ontopA          | 1.16                       |
| Pd3Dy    | -1     | fccAAB          | -1.81                   | 0      | fccAAA          | 1.19                       |
| Pd3Sn    | -5     | fccAAB          | -1.84                   | 3      | fccAAA          | 1.13                       |
| Pd3Sc    | 1      | hcpAAA          | -1.77                   | -5     | fccAAA          | 1.00                       |
| Pt3Co    | 5      | hcpAAA          | -1.76                   | -1     | hcpAAA          | 1.2                        |
| Pt3Dy    | -1     | hcpAAA          | -1.79                   | 1      | ontopA          | 1.18                       |
| Pt3Mn    | 3      | hcpAAA          | -1.81                   | 1      | hcpAAA          | 1.17                       |
| Pt3Sc    | -5     | fccAAB          | -1.84                   | -5     | fccAAA          | 1.19                       |
| Pt3Sn    | -5     | fccAAB          | -1.87                   | 1      | fccAAA          | 1.18                       |
| Pt3Y     | 5      | hcpAAA          | -1.75                   | 0      | fccAAA          | 1.06                       |

Table S 6: Optimum oxygen and hydroxyl adsorption energies (in comparison with Pt at zero strain). The adsorption sites and the applied strain are indicated in the table.

## Variation of $E_{ads}$ with strain

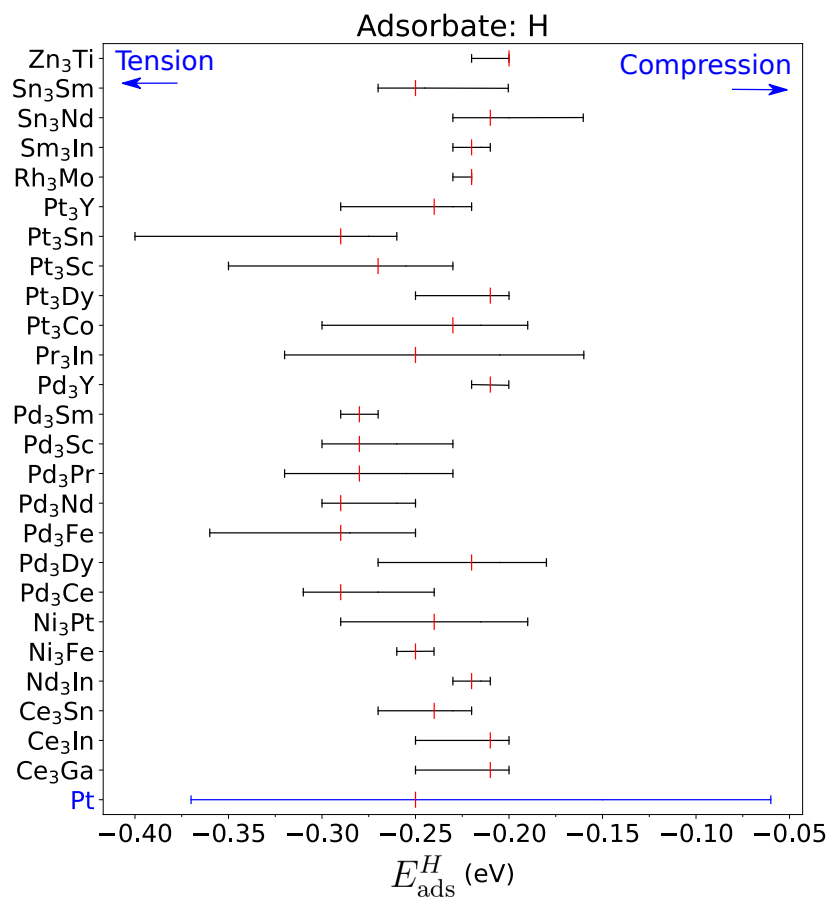

Figure S 5: **Variation of  $E_{ads}^H$** : From -5% compression to 5% tension for the 25 candidates with the most similar energies to pure platinum. The red vertical lines represent the  $E_{ads}^H$  at zero strain.

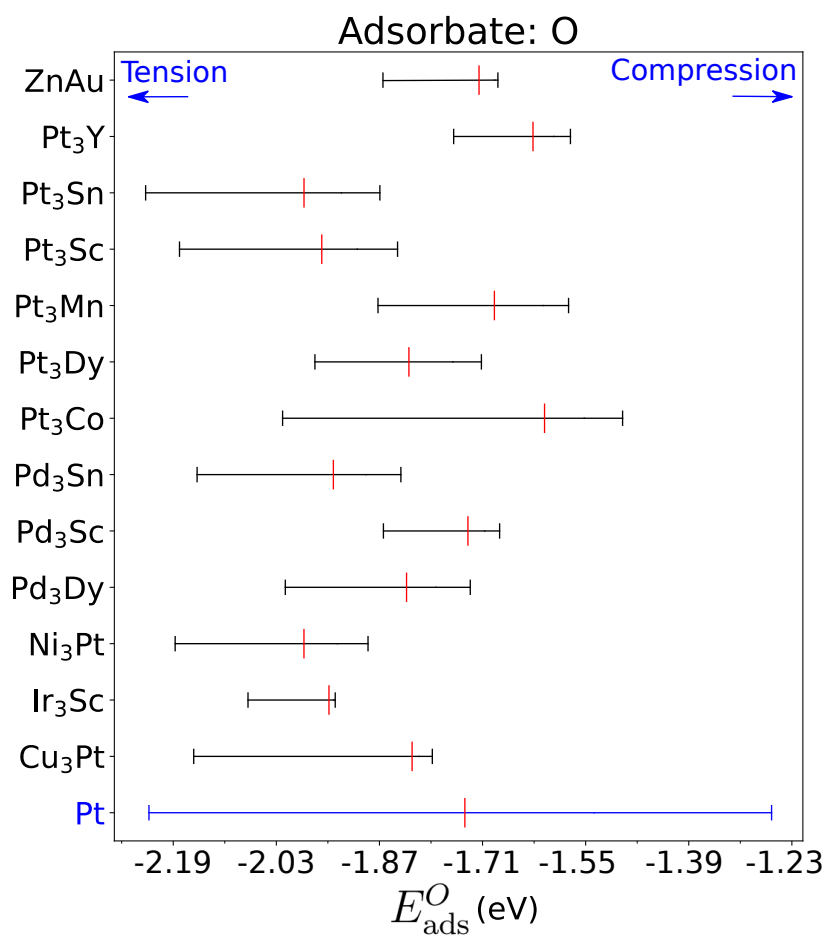

Figure S 6: **Variation of  $E_{\text{ads}}^{\text{O}}$** : From -5% compression to 5% tension for the 13 candidates with the most similar energies to pure platinum. The red vertical lines represent the  $E_{\text{ads}}^{\text{O}}$  at zero strain.

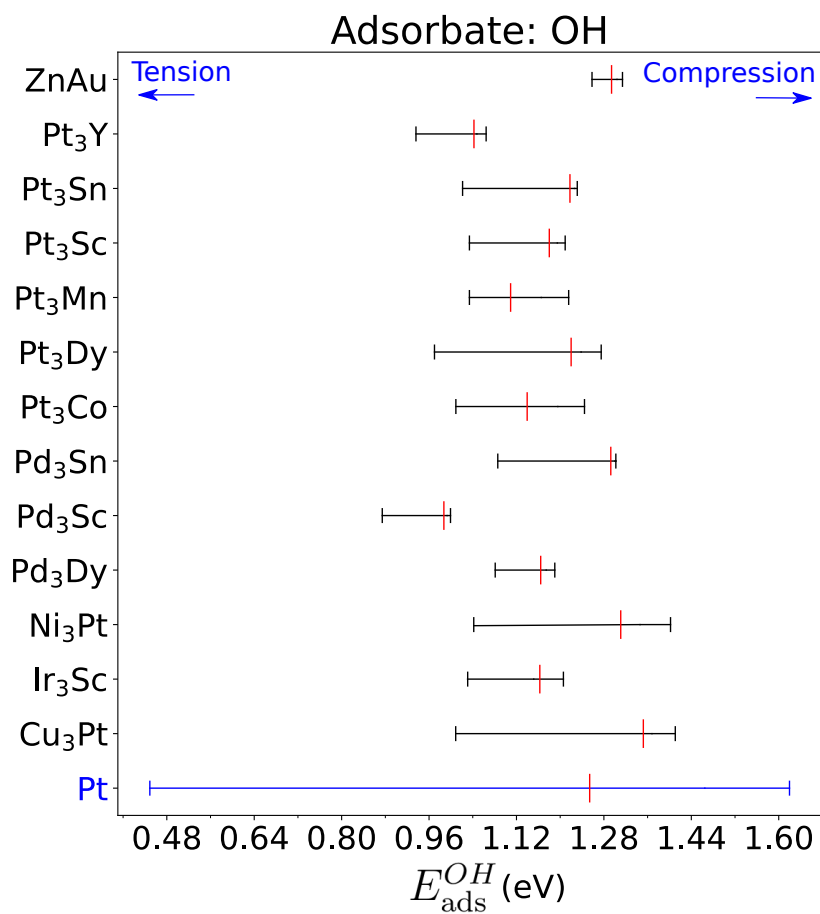

Figure S 7: **Variation of  $E_{\text{ads}}^{\text{OH}}$** : From -5% compression to 5% tension for the 13 candidates with the most similar energies to pure platinum. The red vertical lines represent the  $E_{\text{ads}}^{\text{OH}}$  at zero strain.
